# Supplementary material
Source: PubMed Central journal article supplement (PMC2481571)
Supplement: neo1008_0838SD1.pdf [file neo1008_0838SD1.pdf]

**Table W1.** Rodent Accession Numbers and/or Gene Symbols with Their Corresponding Affymetrix Mouse MG-74Av2 or Rat 230 2.0 Probe Sets, Matched with Their Orthologous Human HG-U133A Probe Sets and Corresponding Human Gene Symbols.

| Mouse Accession Number | Mouse Gene Symbol | Mouse MG-74Av2 Probe Set | Human HG-U133A Probe Set | Human Gene Symbol |
|------------------------|-------------------|--------------------------|--------------------------|-------------------|
| U73198                 | <i>Arhgdig</i>    | 102677_at                | 206888_s_at              | <i>ARHGDIG</i>    |
| U58203                 | <i>Arhgef1</i>    | 98001_at                 | 203055_s_at              | <i>ARHGEF1</i>    |
| U19118                 | <i>Atf3</i>       | 104155_f_at              | 202672_s_at              | <i>ATF3</i>       |
| U43678                 | <i>Atm</i>        | 101180_at                | 210858_x_at              | <i>ATM</i>        |
| U43678                 | <i>Atm</i>        | 101180_at                | 208442_s_at              | <i>ATM</i>        |
| U43678                 | <i>Atm</i>        | 101180_at                | 212672_at                | <i>ATM</i>        |
| AF002823               | <i>Bub1</i>       | 104097_at                | 209642_at                | <i>BUB1</i>       |
| AF002823               | <i>Bub1</i>       | 104097_at                | 216277_at                | <i>BUB1</i>       |
| AF002823               | <i>Bub1</i>       | 104097_at                | 216275_at                | <i>BUB1</i>       |
| AF002823               | <i>Bub1</i>       | 104097_at                | 215509_s_at              | <i>BUB1</i>       |
| AF002823               | <i>Bub1</i>       | 104097_at                | 215508_at                | <i>BUB1</i>       |
| X75483                 | <i>Ccna2</i>      | 99186_at                 | 213226_at                | <i>CCNA2</i>      |
| X75483                 | <i>Ccna2</i>      | 99186_at                 | 203418_at                | <i>CCNA2</i>      |
| X66032                 | <i>Ccnb2</i>      | 94294_at                 | 202705_at                | <i>CCNB2</i>      |
| AI849928               | <i>Ccnd1</i>      | 94232_at                 | 208712_at                | <i>CCND1</i>      |
| AI849928               | <i>Ccnd1</i>      | 94232_at                 | 208711_s_at              | <i>CCND1</i>      |
| X75888                 | <i>Ccne1</i>      | 103034_at                | 213523_at                | <i>CCNE1</i>      |
| L49507                 | <i>Ccng1</i>      | 160127_at                | 208796_s_at              | <i>CCNG1</i>      |
| M38724                 | <i>CDC2a</i>      | 100128_at                | 203213_at                | <i>CDC2</i>       |
| M38724                 | <i>CDC2a</i>      | 100128_at                | 210559_s_at              | <i>CDC2</i>       |
| M38724                 | <i>CDC2a</i>      | 100128_at                | 203214_x_at              | <i>CDC2</i>       |
| AW061324               | <i>CDC20</i>      | 96319_at                 | 202870_s_at              | <i>CDC20</i>      |
| L16926                 | <i>CDC25c</i>     | 102934_s_at              | 205167_s_at              | <i>CDC25C</i>     |
| L16926                 | <i>CDC25c</i>     | 102934_s_at              | 217010_s_at              | <i>CDC25C</i>     |
| L16926                 | <i>CDC25c</i>     | 102934_s_at              | 216914_at                | <i>CDC25C</i>     |
| AB025409               | <i>Cks1</i>       | 97468_at                 | 201897_s_at              | <i>CKS1B</i>      |
| AF005423               | <i>Clk4</i>       | 101937_s_at              | 210346_s_at              | <i>CLK4</i>       |
| AI845538               | <i>Etv6</i>       | 160119_at                | 218358_at                | <i>CRELD2</i>     |
| AW049716               | <i>Egfr</i>       | 101842_g_at              | 201983_s_at              | <i>EGFR</i>       |
| AW049716               | <i>Egfr</i>       | 101842_g_at              | 201984_s_at              | <i>EGFR</i>       |
| AW049716               | <i>Egfr</i>       | 101842_g_at              | 211607_x_at              | <i>EGFR</i>       |
| AW049716               | <i>Egfr</i>       | 101842_g_at              | 210984_x_at              | <i>EGFR</i>       |
| AW049716               | <i>Egfr</i>       | 101842_g_at              | 211551_at                | <i>EGFR</i>       |
| AW049716               | <i>Egfr</i>       | 101842_g_at              | 211550_at                | <i>EGFR</i>       |
| AI844939               | <i>Cri1</i>       | 99191_at                 | 211698_at                | <i>EID1</i>       |
| AI844939               | <i>Cri1</i>       | 99191_at                 | 208669_s_at              | <i>EID1</i>       |
| AI844939               | <i>Cri1</i>       | 99191_at                 | 208670_s_at              | <i>EID1</i>       |
| Z36885                 | <i>Elk4</i>       | 98732_at                 | 206919_at                | <i>ELK4</i>       |
| Z36885                 | <i>Elk4</i>       | 98732_at                 | 205994_at                | <i>ELK4</i>       |
| L10426                 | <i>Etv1</i>       | 92927_at                 | 221911_at                | <i>ETV1</i>       |
| L10426                 | <i>Etv1</i>       | 92927_at                 | 206501_x_at              | <i>ETV1</i>       |
| L10426                 | <i>Etv1</i>       | 92927_at                 | 217061_s_at              | <i>ETV1</i>       |
| L10426                 | <i>Etv1</i>       | 92927_at                 | 217053_x_at              | <i>ETV1</i>       |
| X63190                 | <i>Etv4</i>       | 92979_at                 | 211603_s_at              | <i>ETV4</i>       |
| AF017128               | <i>Fosl1</i>      | 99835_at                 | 204420_at                | <i>FOSL1</i>      |
| AV251191               | <i>Foxc2</i>      | 162016_f_at              | 214520_at                | <i>FOXC2</i>      |
| Y11245                 | <i>Foxm1</i>      | 98306_g_at               | 202580_x_at              | <i>FOXM1</i>      |
| AV138783               | <i>Gadd45b</i>    | 161666_f_at              | 207574_s_at              | <i>GADD45B</i>    |
| AV138783               | <i>Gadd45b</i>    | 161666_f_at              | 209305_s_at              | <i>GADD45B</i>    |
| AV138783               | <i>Gadd45b</i>    | 161666_f_at              | 209304_x_at              | <i>GADD45B</i>    |
| AV138783               | <i>Gadd45b</i>    | 161666_f_at              | 213560_at                | <i>GADD45B</i>    |
| X65128                 | <i>Gas1</i>       | 94813_at                 | 204456_s_at              | <i>GAS1</i>       |
| X65128                 | <i>Gas1</i>       | 94813_at                 | 204457_s_at              | <i>GAS1</i>       |
| AB000096               | <i>Gata2</i>      | 102789_at                | 209710_at                | <i>GATA2</i>      |
| AB000096               | <i>Gata2</i>      | 102789_at                | 210358_x_at              | <i>GATA2</i>      |
| AB000096               | <i>Gata2</i>      | 102789_at                | 207954_at                | <i>GATA2</i>      |
| X55123                 | <i>Gata3</i>      | 100924_at                | 209602_s_at              | <i>GATA3</i>      |
| X55123                 | <i>Gata3</i>      | 100924_at                | 209603_at                | <i>GATA3</i>      |
| X55123                 | <i>Gata3</i>      | 100924_at                | 209604_s_at              | <i>GATA3</i>      |
| M98339                 | <i>Gata4</i>      | 102713_at                | 205517_at                | <i>GATA4</i>      |
| X12761                 | <i>Jun</i>        | 100130_at                | 201464_x_at              | <i>JUN</i>        |
| X12761                 | <i>Jun</i>        | 100130_at                | 201466_s_at              | <i>JUN</i>        |
| X12761                 | <i>Jun</i>        | 100130_at                | 201465_s_at              | <i>JUN</i>        |
| X12761                 | <i>Jun</i>        | 100130_at                | 213281_at                | <i>JUN</i>        |
| AW122780               | <i>Lasp1</i>      | 93793_at                 | 200618_at                | <i>LASP1</i>      |
| AW124311               | <i>Lmo1</i>       | 102413_at                | 206718_at                | <i>LMO1</i>       |
| AF074600               | <i>Lmo4</i>       | 98122_at                 | 209205_s_at              | <i>LMO4</i>       |
| AF074600               | <i>Lmo4</i>       | 98122_at                 | 209204_at                | <i>LMO4</i>       |
| U83902                 | <i>Mad2l1</i>     | 99632_at                 | 203362_s_at              | <i>MAD2L1</i>     |
| U39066                 | <i>Map2k6</i>     | 102828_at                | 205698_s_at              | <i>MAP2K6</i>     |
| U39066                 | <i>Map2k6</i>     | 102828_at                | 205699_at                | <i>MAP2K6</i>     |
| AV270901               | <i>Map3k4</i>     | 161568_f_at              | 216199_s_at              | <i>MAP3K4</i>     |

Table W1. (continued)

| Mouse Accession Number | Mouse Gene Symbol | Mouse MG-74Av2 Probe Set | Human HG-U133A Probe Set | Human Gene Symbol    |
|------------------------|-------------------|--------------------------|--------------------------|----------------------|
| AV270901               | <i>Map3k4</i>     | 161568_f_at              | 204089_x_at              | <i>MAP3K4</i>        |
| AV341985               | <i>Map3k8</i>     | 161768_r_at              | 205027_s_at              | <i>MAP3K8</i>        |
| U88984                 | <i>Map4k4</i>     | 102195_at                | 206571_s_at              | <i>MAP4K4</i>        |
| U88984                 | <i>Map4k4</i>     | 102195_at                | 218181_s_at              | <i>MAP4K4</i>        |
| D87271                 | <i>Erk2</i>       | 93253_at                 | 212271_at                | <i>MAPK1</i>         |
| D87271                 | <i>Erk2</i>       | 93253_at                 | 208351_s_at              | <i>MAPK1</i>         |
| L35236                 | <i>Mapk10</i>     | 100470_at                | 204813_at                | <i>MAPK10</i>        |
| Y11091                 | <i>Mknk1</i>      | 92464_at                 | 209467_s_at              | <i>MKNK1</i>         |
| AV277546               | <i>Rhoip3</i>     | 162066_f_at              | 212197_x_at              | <i>M-RIP</i>         |
| AV277546               | <i>Rhoip3</i>     | 162066_f_at              | 214771_x_at              | <i>M-RIP</i>         |
| AV277546               | <i>Rhoip3</i>     | 162066_f_at              | 214694_at                | <i>M-RIP</i>         |
| AB033921               | <i>Ndr2</i>       | 96088_at                 | 214279_s_at              | <i>NDRG2</i>         |
| AB033921               | <i>Ndr2</i>       | 96088_at                 | 214278_s_at              | <i>NDRG2</i>         |
| AB033921               | <i>Ndr2</i>       | 96088_at                 | 206453_s_at              | <i>NDRG2</i>         |
| M57999                 | <i>Nfkb1</i>      | 98427_s_at               | 209239_at                | <i>NFKB1</i>         |
| AF030896               | <i>Nfkbie</i>     | 101727_at                | 203927_at                | <i>NFKBIE</i>        |
| AF019249               | <i>Nmi</i>        | 101424_at                | 203964_at                | <i>NMI</i>           |
| D50264                 | <i>Arhq</i>       | 101466_at                | 205077_s_at              | <i>PIGF</i>          |
| D50264                 | <i>Arhq</i>       | 101466_at                | 205078_at                | <i>PIGF</i>          |
| U52193                 | <i>Pik3c2a</i>    | 92311_s_at               | 213070_at                | <i>PIK3C2A</i>       |
| U03279                 | <i>Pik3ca</i>     | 92452_at                 | 204369_at                | <i>PIK3CA</i>        |
| U01063                 | <i>Plk</i>        | 93099_f_at               | 202240_at                | <i>PLK1</i>          |
| U01063                 | <i>Plk</i>        | 93099_f_at               | 201429_s_at              | <i>PLK1 (RPL37A)</i> |
| AI853996               | <i>Rab11a</i>     | 96238_at                 | 200863_s_at              | <i>RAB11A</i>        |
| AI853996               | <i>Rab11a</i>     | 96238_at                 | 200864_s_at              | <i>RAB11A</i>        |
| AW208630               | <i>Rab33b</i>     | 97058_f_at               | 221014_s_at              | <i>RAB33B</i>        |
| AB027290               | <i>Rab9</i>       | 95516_at                 | 221808_at                | <i>RAB9A</i>         |
| AA967636               | <i>Rac3</i>       | 104180_at                | 206103_at                | <i>RAC3</i>          |
| AW122347               | <i>Racgap1</i>    | 94953_at                 | 222077_s_at              | <i>RACGAP1</i>       |
| D13803                 | <i>Rad51</i>      | 104527_at                | 205024_s_at              | <i>RAD51</i>         |
| D13803                 | <i>Rad51</i>      | 104527_at                | 205023_at                | <i>RAD51</i>         |
| AF045663               | <i>Rad9</i>       | 93522_at                 | 204828_at                | <i>RAD9A</i>         |
| L32752                 | <i>Rasl2-9</i>    | 102821_s_at              | 200750_s_at              | <i>RAN</i>           |
| L32752                 | <i>Rasl2-9</i>    | 102821_s_at              | 200749_at                | <i>RAN</i>           |
| X56045                 | <i>Ranbp1</i>     | 98573_r_at               | 202483_s_at              | <i>RANBP1</i>        |
| X56045                 | <i>Ranbp1</i>     | 98573_r_at               | 202482_x_at              | <i>RANBP1</i>        |
| X56045                 | <i>Ranbp1</i>     | 98573_r_at               | 221915_s_at              | <i>RANBP1</i>        |
| AF106070               | <i>Rasgrp1</i>    | 98307_at                 | 205590_at                | <i>RASGRP1</i>       |
| U35142                 | <i>Rbbp7</i>      | 93081_at                 | 201092_at                | <i>RBBP7</i>         |
| U36799                 | <i>Rbl2</i>       | 95617_at                 | 212332_at                | <i>RBL2</i>          |
| U36799                 | <i>Rbl2</i>       | 95617_at                 | 212331_at                | <i>RBL2</i>          |
| X99963                 | <i>Rbob</i>       | 101030_at                | 212099_at                | <i>RHOB</i>          |
| AB025943               | <i>Ahrng</i>      | 97927_at                 | 203175_at                | <i>RHOG</i>          |
| AA739233               | <i>Ahrh</i>       | 103231_at                | 204951_at                | <i>RHOH</i>          |
| AI835968               | <i>Rin2</i>       | 160827_at                | 209684_at                | <i>RIN2</i>          |
| U73941                 | <i>Rap2ip</i>     | 103960_at                | 206196_s_at              | <i>RPIP8</i>         |
| U73941                 | <i>Rap2ip</i>     | 103960_at                | 213439_x_at              | <i>RPIP8</i>         |
| AF020526               | <i>Sh2b1psm1</i>  | 101843_at                | 40149_at                 | <i>SH2B1</i>         |
| AF020526               | <i>Sh2b1psm1</i>  | 101843_at                | 209322_s_at              | <i>SH2B1</i>         |
| AW048272               | <i>Sh3bgr</i>     | 96205_at                 | 204979_s_at              | <i>SH3BGR</i>        |
| X87671                 | <i>Sh3bp1</i>     | 92666_at                 | 213633_at                | <i>SH3BP1</i>        |
| U58886                 | <i>Sh3gl2</i>     | 92673_at                 | 205751_at                | <i>SH3GL2</i>        |
| U58887                 | <i>Sh3gl3</i>     | 101412_at                | 205637_s_at              | <i>SH3GL3</i>        |
| U58887                 | <i>Sh3gl3</i>     | 101412_at                | 205636_at                | <i>SH3GL3</i>        |
| U58887                 | <i>Sh3gl3</i>     | 101412_at                | 211565_at                | <i>SH3GL3</i>        |
| AB014485               | <i>Scap2</i>      | 102012_at                | 204362_at                | <i>SKAP2</i>         |
| AB014485               | <i>Scap2</i>      | 102012_at                | 216899_s_at              | <i>SKAP2</i>         |
| AB014485               | <i>Scap2</i>      | 102012_at                | 204361_s_at              | <i>SKAP2</i>         |
| U29056                 | <i>Sla</i>        | 99876_at                 | 203761_at                | <i>SLA</i>           |
| U29056                 | <i>Sla</i>        | 99876_at                 | 203760_s_at              | <i>SLA</i>           |
| U60530                 | <i>Madh2</i>      | 104536_at                | 203077_s_at              | <i>SMAD2</i>         |
| U60530                 | <i>Madh2</i>      | 104536_at                | 203075_at                | <i>SMAD2</i>         |
| U60530                 | <i>Madh2</i>      | 104536_at                | 203076_s_at              | <i>SMAD2</i>         |
| U15566                 | <i>Tbx2</i>       | 92705_at                 | 40560_at                 | <i>TBX2</i>          |
| U15566                 | <i>Tbx2</i>       | 92705_at                 | 213417_at                | <i>TBX2</i>          |
| U15566                 | <i>Tbx2</i>       | 92705_at                 | 205993_s_at              | <i>TBX2</i>          |
| AB008174               | <i>Tcf2</i>       | 101396_at                | 208135_at                | <i>TCF2</i>          |
| AB008174               | <i>Tcf2</i>       | 101396_at                | 205313_at                | <i>TCF2</i>          |
| AF035717               | <i>Tcf21</i>      | 103050_at                | 204931_at                | <i>TCF21</i>         |
| AJ223069               | <i>Tcf3</i>       | 160780_at                | 221016_s_at              | <i>TCF7L1</i>        |
| AF043939               | <i>Dp1</i>        | 97565_r_at               | 212330_at                | <i>TFDP1</i>         |
| AF043939               | <i>Dp1</i>        | 97565_r_at               | 204147_s_at              | <i>TFDP1</i>         |

Table W1. (continued)

| Rat Accession Number | Rat Gene Symbol | Rat 230 2.0 Probe Set | Human HG-U133A Probe Set | Human Gene Symbol |
|----------------------|-----------------|-----------------------|--------------------------|-------------------|
| NM_033230            | <i>Akt1</i>     | 1383126_at            | 207163_s_at              | <i>AKT1</i>       |
| NM_031575            | <i>Akt3</i>     | 1387592_at            | 219393_s_at              | <i>AKT3</i>       |
| NM_031575            | <i>Akt3</i>     | 1387592_at            | 212609_s_at              | <i>AKT3</i>       |
| NM_031575            | <i>Akt3</i>     | 1387592_at            | 212607_at                | <i>AKT3</i>       |
| BE111827             | <i>Arhgap4</i>  | 1374735_at            | 204425_at                | <i>ARHGAP4</i>    |
| AA945062             | <i>Arhgap8</i>  | 1376501_at            | 37117_at                 | <i>ARHGAP8</i>    |
| AA945062             | <i>Arhgap8</i>  | 1376501_at            | 205980_s_at              | <i>PRR5</i>       |
| BF285771             | <i>Arhgdib</i>  | 1373881_at            | 201288_at                | <i>ARHGDI1B</i>   |
| BG377320             |                 | 1373541_at            | 203756_at                | <i>ARHGGEF17</i>  |
| BE116855             | <i>Bcl11b</i>   | 1384944_at            | 219528_s_at              | <i>BCL11B</i>     |
| NM_133416            | <i>Bcl2a1</i>   | 1368482_at            | 205681_at                | <i>BCL2A1</i>     |
| AI411774             | <i>Bcl3</i>     | 1398482_at            | 204908_s_at              | <i>BCL3</i>       |
| AI411774             | <i>Bcl3</i>     | 1398482_at            | 204907_s_at              | <i>BCL3</i>       |
| AI237606             | <i>Bcl6</i>     | 1379368_at            | 203140_at                | <i>BCL6</i>       |
| AI237606             | <i>Bcl6</i>     | 1379368_at            | 215990_s_at              | <i>BCL6</i>       |
| NM_023987            | <i>Birc2</i>    | 1370113_at            | 210538_s_at              | <i>BIRC3</i>      |
| AI227742             | <i>Bok</i>      | 1373733_at            | 221454_at                | <i>BOK</i>        |
| BF396613             | <i>Brca2</i>    | 1381141_at            | 208368_s_at              | <i>BRCA2</i>      |
| BF396613             | <i>Brca2</i>    | 1381141_at            | 214727_at                | <i>BRCA2</i>      |
| BF388785             | <i>Bub1</i>     | 1385086_at            | 209642_at                | <i>BUB1</i>       |
| BF388785             | <i>Bub1</i>     | 1385086_at            | 216277_at                | <i>BUB1</i>       |
| BF388785             | <i>Bub1</i>     | 1385086_at            | 216275_at                | <i>BUB1</i>       |
| BF388785             | <i>Bub1</i>     | 1385086_at            | 215509_s_at              | <i>BUB1</i>       |
| BF388785             | <i>Bub1</i>     | 1385086_at            | 215508_at                | <i>BUB1</i>       |
| BF557145             | <i>Bub1b</i>    | 1383926_at            | 203755_at                | <i>BUB1B</i>      |
| NM_022303            | <i>LOC64171</i> | 1368637_at            | 220162_s_at              | <i>CARD9</i>      |
| BI303370             | <i>Rad51</i>    | 1395480_at            | 220247_at                | <i>CASC5</i>      |
| D85899               | <i>Casp1</i>    | 1369186_at            | 211368_s_at              | <i>CASP1</i>      |
| D85899               | <i>Casp1</i>    | 1369186_at            | 211367_s_at              | <i>CASP1</i>      |
| D85899               | <i>Casp1</i>    | 1369186_at            | 211366_x_at              | <i>CASP1</i>      |
| D85899               | <i>Casp1</i>    | 1369186_at            | 209970_x_at              | <i>CASP1</i>      |
| D85899               | <i>Casp1</i>    | 1369186_at            | 206011_at                | <i>CASP1</i>      |
| NM_053736            | <i>Casp11</i>   | 1387818_at            | 209310_s_at              | <i>CASP4</i>      |
| NM_053736            | <i>Casp11</i>   | 1387818_at            | 213596_at                | <i>CASP4</i>      |
| NM_053736            | <i>Casp11</i>   | 1387818_at            | 208340_at                | <i>CASP4</i>      |
| AA998516             | <i>Ccna2</i>    | 1379582_a_at          | 213226_at                | <i>CCNA2</i>      |
| AA998516             | <i>Ccna2</i>    | 1379582_a_at          | 203418_at                | <i>CCNA2</i>      |
| X64589               | <i>Ccnb1</i>    | 1370346_at            | 214710_s_at              | <i>CCNB1</i>      |
| AW253821             | <i>Ccnb2</i>    | 1389566_at            | 202705_at                | <i>CCNB2</i>      |
| X75207               | <i>Ccnd1</i>    | 1371150_at            | 208712_at                | <i>CCND1</i>      |
| X75207               | <i>Ccnd1</i>    | 1371150_at            | 208711_s_at              | <i>CCND1</i>      |
| NM_019296            | <i>Cdc2a</i>    | 1367776_at            | 203213_at                | <i>CDC2</i>       |
| NM_019296            | <i>Cdc2a</i>    | 1367776_at            | 210559_s_at              | <i>CDC2</i>       |
| NM_019296            | <i>Cdc2a</i>    | 1367776_at            | 203214_x_at              | <i>CDC2</i>       |
| U05341               | <i>Cdc20</i>    | 1387895_s_at          | 202870_s_at              | <i>CDC20</i>      |
| NM_133572            | <i>Cdc25B</i>   | 1370034_at            | 201853_s_at              | <i>CDC25B</i>     |
| BF417638             | <i>Cdca3</i>    | 1374449_at            | 221436_s_at              | <i>CDCA3</i>      |
| AI013919             | <i>Cdken1c</i>  | 1372299_at            | 219533_at                | <i>CDKN1C</i>     |
| AI013919             | <i>Cdken1c</i>  | 1372299_at            | 213183_s_at              | <i>CDKN1C</i>     |
| AI013919             | <i>Cdken1c</i>  | 1372299_at            | 216894_x_at              | <i>CDKN1C</i>     |
| AI013919             | <i>Cdken1c</i>  | 1372299_at            | 213182_x_at              | <i>CDKN1C</i>     |
| AI013919             | <i>Cdken1c</i>  | 1372299_at            | 219534_x_at              | <i>CDKN1C</i>     |
| AI013919             | <i>Cdken1c</i>  | 1372299_at            | 213348_at                | <i>CDKN1C</i>     |
| AF474976             | <i>Cdken2a</i>  | 1369194_a_at          | 209644_x_at              | <i>CDKN2A</i>     |
| AF474976             | <i>Cdken2a</i>  | 1369194_a_at          | 207039_at                | <i>CDKN2A</i>     |
| AF474976             | <i>Cdken2a</i>  | 1369194_a_at          | 211156_at                | <i>CDKN2A</i>     |
| NM_131902            | <i>Cdken2c</i>  | 1370054_at            | 204159_at                | <i>CDKN2C</i>     |
| NM_131902            | <i>Cdken2c</i>  | 1370054_at            | 211792_s_at              | <i>CDKN2C</i>     |
| BE113362             | <i>Cdken3</i>   | 1372685_at            | 209714_s_at              | <i>CDKN3</i>      |
| AI576758             | <i>Segf</i>     | 1392672_at            | 211709_s_at              | <i>CLEC11A</i>    |
| AI576758             | <i>Segf</i>     | 1392672_at            | 210783_x_at              | <i>CLEC11A</i>    |
| AI576758             | <i>Segf</i>     | 1392672_at            | 205131_x_at              | <i>CLEC11A</i>    |
| BG371721             | <i>Clpx</i>     | 1398698_at            | 204809_at                | <i>CLPX</i>       |
| BE107780             |                 | 1398204_at            | 203575_at                | <i>CSNK2A2</i>    |
| NM_022266            | <i>Ctgf</i>     | 1367631_at            | 209101_at                | <i>CTGF</i>       |
| NM_017286            | <i>Cyp11a1</i>  | 1368468_at            | 204309_at                | <i>CYP11A1</i>    |
| X00469               | <i>Cyp1a1</i>   | 1370269_at            | 205749_at                | <i>CYP1A1</i>     |
| D38381               | <i>Cyp3a18</i>  | 1398307_at            | 211442_x_at              | <i>CYP3A43</i>    |
| D38381               | <i>Cyp3a18</i>  | 1398307_at            | 211440_x_at              | <i>CYP3A43</i>    |
| D38381               | <i>Cyp3a18</i>  | 1398307_at            | 207773_x_at              | <i>CYP3A43</i>    |
| D38381               | <i>Cyp3a18</i>  | 1398307_at            | 211441_x_at              | <i>CYP3A43</i>    |
| NM_053679            | <i>Dffa</i>     | 1389195_at            | 203277_at                | <i>DFFA</i>       |

Table W1. (continued)

| Rat Accession Number | Rat Gene Symbol | Rat 230 2.0 Probe Set | Human HG-U133A Probe Set | Human Gene Symbol |
|----------------------|-----------------|-----------------------|--------------------------|-------------------|
| NM_053883            | <i>Dusp6</i>    | 1387024_at            | 208892_s_at              | <i>DUSP6</i>      |
| NM_053883            | <i>Dusp6</i>    | 1387024_at            | 208891_at                | <i>DUSP6</i>      |
| NM_053883            | <i>Dusp6</i>    | 1387024_at            | 208893_s_at              | <i>DUSP6</i>      |
| AI578135             | <i>Ect2</i>     | 1383747_at            | 219787_s_at              | <i>ECT2</i>       |
| BF284634             |                 | 1390112_at            | 201842_s_at              | <i>EFEMP1</i>     |
| BF284634             |                 | 1390112_at            | 201843_s_at              | <i>EFEMP1</i>     |
| BF418373             |                 | 1393335_at            | 219454_at                | <i>EGFL6</i>      |
| AI547942             |                 | 1378721_at            | 201911_s_at              | <i>FARP1</i>      |
| AI547942             |                 | 1378721_at            | 201910_at                | <i>FARP1</i>      |
| BI289400             | <i>Fes</i>      | 1380621_at            | 205418_at                | <i>FES</i>        |
| NM_053428            | <i>Fgf13</i>    | 1368114_at            | 205110_s_at              | <i>FGF13</i>      |
| NM_022603            | <i>Fgfbp1</i>   | 1368349_at            | 205014_at                | <i>FGFBP1</i>     |
| L19107               | <i>FGFR2</i>    | 1388168_a_at          | 208229_at                | <i>FGFR2</i>      |
| L19107               | <i>FGFR2</i>    | 1388168_a_at          | 208228_s_at              | <i>FGFR2</i>      |
| L19107               | <i>FGFR2</i>    | 1388168_a_at          | 211399_at                | <i>FGFR2</i>      |
| L19107               | <i>FGFR2</i>    | 1388168_a_at          | 211401_s_at              | <i>FGFR2</i>      |
| L19107               | <i>FGFR2</i>    | 1388168_a_at          | 211398_at                | <i>FGFR2</i>      |
| L19107               | <i>FGFR2</i>    | 1388168_a_at          | 203639_s_at              | <i>FGFR2</i>      |
| L19107               | <i>FGFR2</i>    | 1388168_a_at          | 203638_s_at              | <i>FGFR2</i>      |
| L19107               | <i>FGFR2</i>    | 1388168_a_at          | 208234_x_at              | <i>FGFR2</i>      |
| L19107               | <i>FGFR2</i>    | 1388168_a_at          | 208225_at                | <i>FGFR2</i>      |
| L19107               | <i>FGFR2</i>    | 1388168_a_at          | 211400_at                | <i>FGFR2</i>      |
| NM_021774            | <i>Fhit</i>     | 1369318_at            | 206492_at                | <i>FHIT</i>       |
| BE112403             |                 | 1397648_at            | 221308_at                | <i>FRS2</i>       |
| AI230396             | <i>Fyn</i>      | 1373683_at            | 216033_s_at              | <i>FYN</i>        |
| AI230396             | <i>Fyn</i>      | 1373683_at            | 210105_s_at              | <i>FYN</i>        |
| AI230396             | <i>Fyn</i>      | 1373683_at            | 212486_s_at              | <i>FYN</i>        |
| BI287978             | <i>Gadd45b</i>  | 1372016_at            | 207574_s_at              | <i>GADD45B</i>    |
| BI287978             | <i>Gadd45b</i>  | 1372016_at            | 209305_s_at              | <i>GADD45B</i>    |
| BI287978             | <i>Gadd45b</i>  | 1372016_at            | 209304_x_at              | <i>GADD45B</i>    |
| BI287978             | <i>Gadd45b</i>  | 1372016_at            | 213560_at                | <i>GADD45B</i>    |
| AI599423             | <i>Gadd45g</i>  | 1388792_at            | 204121_at                | <i>GADD45G</i>    |
| NM_017195            | <i>Gap43</i>    | 1371287_at            | 216963_s_at              | <i>GAP43</i>      |
| NM_017195            | <i>Gap43</i>    | 1371287_at            | 204471_at                | <i>GAP43</i>      |
| NM_017195            | <i>Gap43</i>    | 1371287_at            | 216967_at                | <i>GAP43</i>      |
| AJ131902             | <i>Gas7</i>     | 1370963_at            | 210872_x_at              | <i>GAS7</i>       |
| AJ131902             | <i>Gas7</i>     | 1370963_at            | 211067_s_at              | <i>GAS7</i>       |
| AJ131902             | <i>Gas7</i>     | 1370963_at            | 202191_s_at              | <i>GAS7</i>       |
| AJ131902             | <i>Gas7</i>     | 1370963_at            | 207704_s_at              | <i>GAS7</i>       |
| AJ131902             | <i>Gas7</i>     | 1370963_at            | 202192_s_at              | <i>GAS7</i>       |
| BI289525             | <i>Gdf1</i>     | 1377506_at            | 206397_x_at              | <i>GDF1</i>       |
| NM_017017            | <i>Hgf</i>      | 1387701_at            | 210998_s_at              | <i>HGF</i>        |
| NM_017017            | <i>Hgf</i>      | 1387701_at            | 210997_at                | <i>HGF</i>        |
| NM_017017            | <i>Hgf</i>      | 1387701_at            | 210755_at                | <i>HGF</i>        |
| NM_017017            | <i>Hgf</i>      | 1387701_at            | 209960_at                | <i>HGF</i>        |
| NM_017017            | <i>Hgf</i>      | 1387701_at            | 209961_s_at              | <i>HGF</i>        |
| BE119649             | <i>Hgf1ac</i>   | 1381006_at            | 207027_at                | <i>HGFAC</i>      |
| AI548958             |                 | 1393790_at            | 219983_at                | <i>HRASLS</i>     |
| AI548958             |                 | 1393790_at            | 219984_s_at              | <i>HRASLS</i>     |
| M15481               | <i>Igf1</i>     | 1370333_a_at          | 209540_at                | <i>IGF1</i>       |
| M15481               | <i>Igf1</i>     | 1370333_a_at          | 209541_at                | <i>IGF1</i>       |
| M15481               | <i>Igf1</i>     | 1370333_a_at          | 211577_s_at              | <i>IGF1</i>       |
| M15481               | <i>Igf1</i>     | 1370333_a_at          | 209542_x_at              | <i>IGF1</i>       |
| NM_012588            | <i>Igf1bp3</i>  | 1367652_at            | 210095_s_at              | <i>IGFBP3</i>     |
| NM_012588            | <i>Igf1bp3</i>  | 1367652_at            | 212143_s_at              | <i>IGFBP3</i>     |
| BE108969             | <i>Igf1bp4</i>  | 1371462_at            | 201508_at                | <i>IGFBP4</i>     |
| AI233246             | <i>Igf1bp7</i>  | 1371357_at            | 201163_s_at              | <i>IGFBP7</i>     |
| AI233246             | <i>Igf1bp7</i>  | 1371357_at            | 213910_at                | <i>IGFBP7</i>     |
| AI233246             | <i>Igf1bp7</i>  | 1371357_at            | 201162_at                | <i>IGFBP7</i>     |
| BE111697             | <i>Cdc23</i>    | 1373722_at            | 218755_at                | <i>KIF20A</i>     |
| BG381002             | <i>Lcm1</i>     | 1388747_at            | 221515_s_at              | <i>LCMT1</i>      |
| AI229354             | <i>Lgi1</i>     | 1386023_at            | 206349_at                | <i>LG11</i>       |
| BF412229             |                 | 1398569_at            | 221640_s_at              | <i>LRDD</i>       |
| AI716087             |                 | 1375894_at            | 218437_s_at              | <i>LZTFL1</i>     |
| AW143296             | <i>Mad2l1</i>   | 1398602_at            | 203362_s_at              | <i>MAD2L1</i>     |
| NM_019318            | <i>Maf</i>      | 1385243_at            | 209348_s_at              | <i>MAF</i>        |
| NM_019318            | <i>Maf</i>      | 1385243_at            | 209347_s_at              | <i>MAF</i>        |
| NM_019318            | <i>Maf</i>      | 1385243_at            | 206363_at                | <i>MAF</i>        |
| AI714002             | <i>Mki67</i>    | 1374775_at            | 212022_s_at              | <i>MKI67</i>      |
| AI714002             | <i>Mki67</i>    | 1374775_at            | 212023_s_at              | <i>MKI67</i>      |
| AI714002             | <i>Mki67</i>    | 1374775_at            | 212021_s_at              | <i>MKI67</i>      |
| AI714002             | <i>Mki67</i>    | 1374775_at            | 212020_s_at              | <i>MKI67</i>      |

Table W1. (continued)

| Rat Accession Number | Rat Gene Symbol  | Rat 230 2.0 Probe Set | Human HG-U133A Probe Set | Human Gene Symbol    |
|----------------------|------------------|-----------------------|--------------------------|----------------------|
| BE115673             |                  | 1392086_at            | 203037_s_at              | <i>MTSS1</i>         |
| BE115673             |                  | 1392086_at            | 203036_s_at              | <i>MTSS1</i>         |
| BE115673             |                  | 1392086_at            | 210360_s_at              | <i>MTSS1</i>         |
| BE115673             |                  | 1392086_at            | 210359_at                | <i>MTSS1</i>         |
| NM_012603            | <i>Myc</i>       | 1368308_at            | 202431_s_at              | <i>MYC</i>           |
| BI300996             | <i>Mycl1</i>     | 1395781_at            | 214058_at                | <i>MYCL1</i>         |
| BI300996             | <i>Mycl1</i>     | 1395781_at            | 215491_at                | <i>MYCL1</i>         |
| NM_133583            | <i>Ndrp2</i>     | 1387121_a_at          | 214279_s_at              | <i>NDRG2</i>         |
| NM_133583            | <i>Ndrp2</i>     | 1387121_a_at          | 214278_s_at              | <i>NDRG2</i>         |
| NM_133583            | <i>Ndrp2</i>     | 1387121_a_at          | 206453_s_at              | <i>NDRG2</i>         |
| BG666709             | <i>Ndr4</i>      | 1370229_at            | 209159_s_at              | <i>NDRG4</i>         |
| NM_021589            | <i>Ntrk1</i>     | 1369000_at            | 208605_s_at              | <i>NTRK1</i>         |
| NM_019210            | <i>Pak3</i>      | 1368902_at            | 214607_at                | <i>PAK3</i>          |
| U05989               | <i>Pawr</i>      | 1368702_at            | 204005_s_at              | <i>PAWR</i>          |
| U05989               | <i>Pawr</i>      | 1368702_at            | 204004_at                | <i>PAWR</i>          |
| U05989               | <i>Pawr</i>      | 1368702_at            | 214237_x_at              | <i>PAWR</i>          |
| U05989               | <i>Pawr</i>      | 1368702_at            | 214090_at                | <i>PAWR</i>          |
| BE100812             | <i>Pdgfa</i>     | 1379375_at            | 205463_s_at              | <i>PDGFA</i>         |
| BE100812             | <i>Pdgfa</i>     | 1379375_at            | 216867_s_at              | <i>PDGFA</i>         |
| NM_031317            | <i>Pdgfc</i>     | 1392274_at            | 218718_at                | <i>PDGFC</i>         |
| BM389426             | <i>Pdgfrb</i>    | 1370642_s_at          | 202273_at                | <i>PDGFRB</i>        |
| BM384311             |                  | 1374616_at            | 205226_at                | <i>PDGFRL</i>        |
| U10188               | <i>Plk1</i>      | 1370297_at            | 202240_at                | <i>PLK1</i>          |
| U10188               | <i>Plk1</i>      | 1370297_at            | 201429_s_at              | <i>PLK1 (RPL37A)</i> |
| BE109322             | <i>Plk4</i>      | 1377832_at            | 204886_at                | <i>PLK4</i>          |
| BE109322             | <i>Plk4</i>      | 1377832_at            | 204887_s_at              | <i>PLK4</i>          |
| BE109322             | <i>Plk4</i>      | 1377832_at            | 211088_s_at              | <i>PLK4</i>          |
| NM_013196            | <i>Ppara</i>     | 1394800_at            | 210771_at                | <i>PPARA</i>         |
| NM_013196            | <i>Ppara</i>     | 1394800_at            | 206870_at                | <i>PPARA</i>         |
| NM_013124            | <i>Pparg</i>     | 1369179_a_at          | 208510_s_at              | <i>PPARG</i>         |
| AA891940             | <i>Arhc</i>      | 1371659_at            | 200885_at                | <i>PPM1J</i>         |
| BI282953             | <i>Pycard</i>    | 1389873_at            | 221666_s_at              | <i>PYCARD</i>        |
| NM_053459            | <i>Rab27b</i>    | 1370122_at            | 207017_at                | <i>RAB27B</i>        |
| NM_053459            | <i>Rab27b</i>    | 1370122_at            | 207018_s_at              | <i>RAB27B</i>        |
| AA924620             | <i>Rab40b</i>    | 1383826_at            | 204547_at                | <i>RAB40B</i>        |
| AA924620             | <i>Rab40b</i>    | 1383826_at            | 217597_x_at              | <i>RAB40B</i>        |
| AI409259             | <i>Racgap1</i>   | 1373658_at            | 222077_s_at              | <i>RACGAP1</i>       |
| BF284067             |                  | 1373631_at            | 203911_at                | <i>RAP1GAP</i>       |
| BF284067             |                  | 1373631_at            | 210618_at                | <i>RAP1GAP</i>       |
| NM_133410            | <i>Rap2b</i>     | 1392922_at            | 213923_at                | <i>RAP2B</i>         |
| NM_133410            | <i>Rap2b</i>     | 1392922_at            | 214487_s_at              | <i>RAP2B</i>         |
| NM_133410            | <i>Rap2b</i>     | 1392922_at            | 214488_at                | <i>RAP2B</i>         |
| AI237779             | <i>Rasa3</i>     | 1392224_at            | 206221_at                | <i>RASA3</i>         |
| AI237779             | <i>Rasa3</i>     | 1392224_at            | 206220_s_at              | <i>RASA3</i>         |
| AW532114             | <i>Rasgrp2</i>   | 1374872_at            | 214367_at                | <i>RASGRP2</i>       |
| AW532114             | <i>Rasgrp2</i>   | 1374872_at            | 214368_at                | <i>RASGRP2</i>       |
| AW532114             | <i>Rasgrp2</i>   | 1374872_at            | 214369_s_at              | <i>RASGRP2</i>       |
| AW532114             | <i>Rasgrp2</i>   | 1374872_at            | 208206_s_at              | <i>RASGRP2</i>       |
| AA955648             | <i>Arhd</i>      | 1382197_at            | 209885_at                | <i>RHOD</i>          |
| AA955648             | <i>Arhd</i>      | 1382197_at            | 31846_at                 | <i>RHOD</i>          |
| BE097238             | <i>RICS</i>      | 1377061_at            | 210791_s_at              | <i>RICS</i>          |
| BE097238             | <i>RICS</i>      | 1377061_at            | 203431_s_at              | <i>RICS</i>          |
| AI706777             | <i>Rin3</i>      | 1375020_at            | 60471_at                 | <i>RIN3</i>          |
| AI706777             | <i>Rin3</i>      | 1375020_at            | 219457_s_at              | <i>RIN3</i>          |
| AI706777             | <i>Rin3</i>      | 1375020_at            | 219456_s_at              | <i>RIN3</i>          |
| AI706777             | <i>Rin3</i>      | 1375020_at            | 220439_at                | <i>RIN3</i>          |
| AI144754             | <i>Rnd1</i>      | 1381533_at            | 210056_at                | <i>RND1</i>          |
| AI235414             |                  | 1377029_at            | 210479_s_at              | <i>RORA</i>          |
| AI235414             |                  | 1377029_at            | 210426_x_at              | <i>RORA</i>          |
| BE110171             |                  | 1379833_at            | 206419_at                | <i>RORC</i>          |
| NM_021865            | <i>Jundp1</i>    | 1369891_at            | 220358_at                | <i>SNFT</i>          |
| NM_021578            | <i>Tgfb1</i>     | 1370082_at            | 203085_s_at              | <i>TGFB1</i>         |
| NM_021578            | <i>Tgfb1</i>     | 1370082_at            | 203084_at                | <i>TGFB1</i>         |
| NM_031131            | <i>Tgfb2</i>     | 1387172_a_at          | 220407_s_at              | <i>TGFB2</i>         |
| NM_031131            | <i>Tgfb2</i>     | 1387172_a_at          | 209908_s_at              | <i>TGFB2</i>         |
| NM_031131            | <i>Tgfb2</i>     | 1387172_a_at          | 220406_at                | <i>TGFB2</i>         |
| BI283829             | <i>Hdgfrp3</i>   | 1379482_at            | 219892_at                | <i>TM6SF1</i>        |
| NM_012870            | <i>Tnfrsf11b</i> | 1369407_at            | 204933_s_at              | <i>TNFRSF11B</i>     |
| NM_012870            | <i>Tnfrsf11b</i> | 1369407_at            | 204932_at                | <i>TNFRSF11B</i>     |
| BI303379             | <i>Tnfrsf12a</i> | 1371785_at            | 218368_s_at              | <i>TNFRSF12A</i>     |
| AA800814             | <i>Tnfsf13</i>   | 1377353_a_at          | 210314_x_at              | <i>TNFSF13</i>       |
| AA800814             | <i>Tnfsf13</i>   | 1377353_a_at          | 209500_x_at              | <i>TNFSF13</i>       |

Table W1. (continued)

| Rat Accession Number | Rat Gene Symbol | Rat 230 2.0 Probe Set | Human HG-U133A Probe Set | Human Gene Symbol |
|----------------------|-----------------|-----------------------|--------------------------|-------------------|
| AA800814             | <i>Tnfrsf13</i> | 1377353_a_at          | 209499_x_at              | <i>TNFRSF13</i>   |
| AA800814             | <i>Tnfrsf13</i> | 1377353_a_at          | 211495_x_at              | <i>TNFRSF13</i>   |
| AA900477             |                 | 1384170_at            | 205537_s_at              | <i>VAV2</i>       |
| AA900477             |                 | 1384170_at            | 205536_at                | <i>VAV2</i>       |
| NM_053653            | <i>Vegfc</i>    | 1368463_at            | 209946_at                | <i>VEGFC</i>      |
| NM_031534            | <i>Wt1</i>      | 1369695_at            | 206067_s_at              | <i>WT1</i>        |
| NM_031534            | <i>Wt1</i>      | 1369695_at            | 216953_s_at              | <i>WT1</i>        |

  

| Mouse Accession Number | Mouse Gene     | Mouse MG-74Av2 Probe Set | Rat Accession Number | Rat Gene Symbol | Rat 230 2.0 Probe Set | Human HG-U133A Probe Set | Human Gene Symbol    |
|------------------------|----------------|--------------------------|----------------------|-----------------|-----------------------|--------------------------|----------------------|
| AF002823               | <i>Bub1</i>    | 104097_at                | BF388785             | <i>Bub1</i>     | 1385086_at            | 209642_at                | <i>BUB1</i>          |
| AF002823               | <i>Bub1</i>    | 104097_at                | BF388785             | <i>Bub1</i>     | 1385086_at            | 216277_at                | <i>BUB1</i>          |
| AF002823               | <i>Bub1</i>    | 104097_at                | BF388785             | <i>Bub1</i>     | 1385086_at            | 216275_at                | <i>BUB1</i>          |
| AF002823               | <i>Bub1</i>    | 104097_at                | BF388785             | <i>Bub1</i>     | 1385086_at            | 215509_s_at              | <i>BUB1</i>          |
| AF002823               | <i>Bub1</i>    | 104097_at                | BF388785             | <i>Bub1</i>     | 1385086_at            | 215508_at                | <i>BUB1</i>          |
| X75483                 | <i>Ccna2</i>   | 99186_at                 | AA998516             | <i>Ccna2</i>    | 1379582_a_at          | 213226_at                | <i>CCNA2</i>         |
| X75483                 | <i>Ccna2</i>   | 99186_at                 | AA998516             | <i>Ccna2</i>    | 1379582_a_at          | 203418_at                | <i>CCNA2</i>         |
| X66032                 | <i>Ccnb2</i>   | 94294_at                 | AW253821             | <i>Ccnb2</i>    | 1389566_at            | 202705_at                | <i>CCNB2</i>         |
| AI849928               | <i>Ccnd1</i>   | 94232_at                 | X75207               | <i>Ccnd1</i>    | 1371150_at            | 208712_at                | <i>CCND1</i>         |
| AI849928               | <i>Ccnd1</i>   | 94232_at                 | X75207               | <i>Ccnd1</i>    | 1371150_at            | 208711_s_at              | <i>CCND1</i>         |
| M38724                 | <i>CDC2a</i>   | 100128_at                | NM_019296            | <i>Cdc2a</i>    | 1367776_at            | 203213_at                | <i>CDC2</i>          |
| M38724                 | <i>CDC2a</i>   | 100128_at                | NM_019296            | <i>Cdc2a</i>    | 1367776_at            | 210559_s_at              | <i>CDC2</i>          |
| M38724                 | <i>CDC2a</i>   | 100128_at                | NM_019296            | <i>Cdc2a</i>    | 1367776_at            | 203214_x_at              | <i>CDC2</i>          |
| AW061324               | <i>CDC20</i>   | 96319_at                 | U05341               | <i>Cdc20</i>    | 1387895_s_at          | 202870_s_at              | <i>CDC20</i>         |
| AV138783               | <i>Gadd45b</i> | 161666_f_at              | BI287978             | <i>Gadd45b</i>  | 1372016_at            | 207574_s_at              | <i>GADD45B</i>       |
| AV138783               | <i>Gadd45b</i> | 161666_f_at              | BI287978             | <i>Gadd45b</i>  | 1372016_at            | 209305_s_at              | <i>GADD45B</i>       |
| AV138783               | <i>Gadd45b</i> | 161666_f_at              | BI287978             | <i>Gadd45b</i>  | 1372016_at            | 209304_x_at              | <i>GADD45B</i>       |
| AV138783               | <i>Gadd45b</i> | 161666_f_at              | BI287978             | <i>Gadd45b</i>  | 1372016_at            | 213560_at                | <i>GADD45B</i>       |
| U83902                 | <i>Mad2l1</i>  | 99632_at                 | AW143296             | <i>Mad2l1</i>   | 1398602_at            | 203362_s_at              | <i>MAD2L1</i>        |
| AB033921               | <i>Ndr2</i>    | 96088_at                 | NM_133583            | <i>Ndr2</i>     | 1387121_a_at          | 214279_s_at              | <i>NDRG2</i>         |
| AB033921               | <i>Ndr2</i>    | 96088_at                 | NM_133583            | <i>Ndr2</i>     | 1387121_a_at          | 214278_s_at              | <i>NDRG2</i>         |
| AB033921               | <i>Ndr2</i>    | 96088_at                 | NM_133583            | <i>Ndr2</i>     | 1387121_a_at          | 206453_s_at              | <i>NDRG2</i>         |
| U01063                 | <i>Plk</i>     | 93099_f_at               | U10188               | <i>Plk1</i>     | 1370297_at            | 202240_at                | <i>PLK1</i>          |
| U01063                 | <i>Plk</i>     | 93099_f_at               | U10188               | <i>Plk1</i>     | 1370297_at            | 201429_s_at              | <i>PLK1 (RPL37A)</i> |
| AW122347               | <i>Racgap1</i> | 94953_at                 | AI409259             | <i>Racgap1</i>  | 1373658_at            | 222077_s_at              | <i>RACGAP1</i>       |
